# Supplementary material for: NO3–⋯NO3– and NO3–⋯π interactions in the crystal of urea nitrate
Source: Royal Society of Chemistry journal article supplement (doi:10.1039/b709180j), 2007-01-01
Supplement: b709180j.pdf [file b709180j.pdf]

## Electronic Supplementary Material for CrystEngComm

This journal is © The Royal Society of Chemistry 2007

|        |       |       |       |       |       |       |       |       |       |
|--------|-------|-------|-------|-------|-------|-------|-------|-------|-------|
| H(1NB) | 0.000 | 0.000 | 0.000 | 0.000 | 0.000 | 0.000 | 0.000 | 0.000 | 1.200 |
| H(1O)  | 0.000 | 0.000 | 0.000 | 0.000 | 0.000 | 0.000 | 0.000 | 0.000 | 1.200 |
| H(1NA) | 0.000 | 0.000 | 0.000 | 0.000 | 0.000 | 0.000 | 0.000 | 0.000 | 1.200 |
| H(2NA) | 0.000 | 0.000 | 0.000 | 0.000 | 0.000 | 0.000 | 0.000 | 0.000 | 1.200 |

TABLE S5. HEXADECAPOLE POPULATION PARAMETERS.

| ATOM   | H40        | H41+  | H41-  | H42+  | H42-  | H43+  | H43-  | H44+  | H44-  | KAPPA' |
|--------|------------|-------|-------|-------|-------|-------|-------|-------|-------|--------|
| O(3)   | 0.000      | 0.000 | 0.000 | 0.000 | 0.000 | 0.000 | 0.000 | 0.000 | 0.000 | 1.000  |
| O(1)   | 0.000      | 0.000 | 0.000 | 0.000 | 0.000 | 0.000 | 0.000 | 0.000 | 0.000 | 1.000  |
| O(4)   | 0.000      | 0.000 | 0.000 | 0.000 | 0.000 | 0.000 | 0.000 | 0.000 | 0.000 | 1.000  |
| O(2)   | 0.000      | 0.000 | 0.000 | 0.000 | 0.000 | 0.000 | 0.000 | 0.000 | 0.000 | 1.000  |
| N(1)   | 0.000      | 0.000 | 0.000 | 0.000 | 0.000 | 0.000 | 0.000 | 0.000 | 0.000 | 1.000  |
| N(3)   | 0.000      | 0.000 | 0.000 | 0.000 | 0.000 | 0.000 | 0.000 | 0.000 | 0.000 | 1.000  |
| N(2)   | 0.000      | 0.000 | 0.000 | 0.000 | 0.000 | 0.000 | 0.000 | 0.000 | 0.000 | 1.000  |
| C(1)   | 0.000      | 0.000 | 0.000 | 0.000 | 0.000 | 0.000 | 0.000 | 0.000 | 0.000 | 1.000  |
| H(2NB) | 0.035(25)  | 0.000 | 0.000 | 0.000 | 0.000 | 0.000 | 0.000 | 0.000 | 0.000 | 1.200  |
| H(1NB) | 0.002(23)  | 0.000 | 0.000 | 0.000 | 0.000 | 0.000 | 0.000 | 0.000 | 0.000 | 1.200  |
| H(1O)  | 0.003(25)  | 0.000 | 0.000 | 0.000 | 0.000 | 0.000 | 0.000 | 0.000 | 0.000 | 1.200  |
| H(1NA) | -0.057(25) | 0.000 | 0.000 | 0.000 | 0.000 | 0.000 | 0.000 | 0.000 | 0.000 | 1.200  |
| H(2NA) | -0.022(23) | 0.000 | 0.000 | 0.000 | 0.000 | 0.000 | 0.000 | 0.000 | 0.000 | 1.200  |

```

loop_
_atom_local_axes_label
_atom_local_axes_atom0
_atom_local_axes_ax1
_atom_local_axes_atom1
_atom_local_axes_atom2
_atom_local_axes_ax2
O(3) N(3) X O(3) H(2NB) Y
O(1) H(1O) X O(1) C(1) Y
O(4) N(3) X O(4) O(3) Y
O(2) N(3) X O(2) H(1NB) Y
N(1) H(1NA) X N(1) H(1NB) Y
N(3) O(2) X N(3) O(3) Y
N(2) H(2NA) X N(2) H(2NB) Y
C(1) O(1) X C(1) N(2) Y
H(2NB) N(2) Z H(2NB) H(2NA) Y
H(1NB) N(1) Z H(1NB) H(1NA) Y
H(1O) O(1) Z H(1O) C(1) Y
H(1NA) N(1) Z H(1NA) H(1NB) Y
H(2NA) N(2) Z H(2NA) H(2NB) Y

```

```

loop_
_atom_site_aniso_label
_atom_site_aniso_U_11
_atom_site_aniso_U_22
_atom_site_aniso_U_33
_atom_site_aniso_U_12
_atom_site_aniso_U_13
_atom_site_aniso_U_23
O(3) 0.0139 0.0076 0.0142 0.0007 -0.0022 0.0010
O(1) 0.0138 0.0064 0.0158 -0.0011 -0.0011 0.0000
O(4) 0.0178 0.0066 0.0175 -0.0011 -0.0036 -0.0003
O(2) 0.0168 0.0098 0.0189 -0.0002 -0.0076 -0.0007
N(1) 0.0131 0.0077 0.0153 0.0004 -0.0018 0.0019
N(3) 0.0106 0.0063 0.0111 -0.0002 -0.0007 0.0002
N(2) 0.0126 0.0090 0.0129 -0.0005 -0.0023 -0.0005
C(1) 0.0101 0.0065 0.0107 -0.0002 0.0003 0.0004

```

```
data_FFT
_refine_diff_density_max    0.090
_refine_diff_density_min   -0.133
_refine_diff_density_rms   0.020
```

---

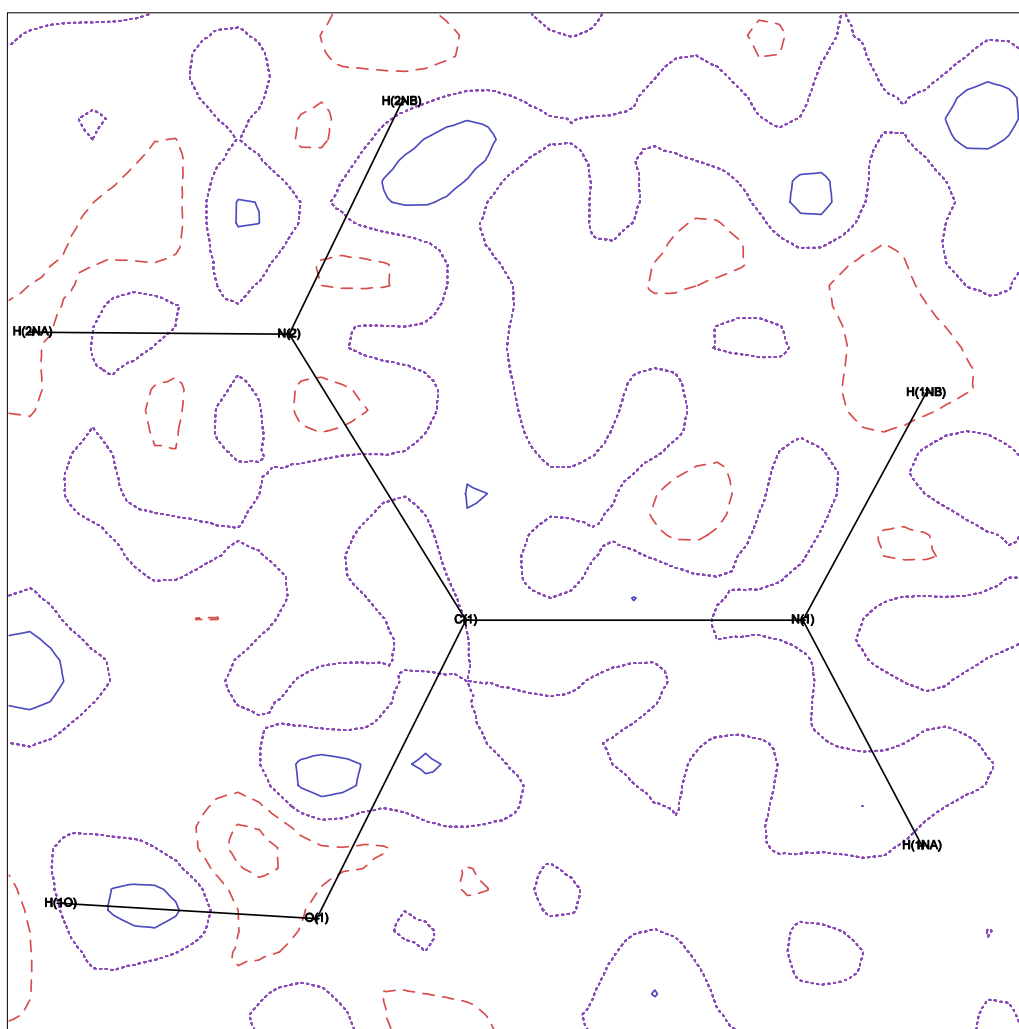

The residual electron density map in the plane of the urea cation. Contours are drawn with  $0.05 \text{ e}\text{\AA}^{-3}$  interval, the negative ones (red) are dashed, the zero contour is drawn by a purple dot line.
